# Supplementary material for: Local emergence in Amazonia of Plasmodium falciparum k13 C580Y mutants associated with in vitro artemisinin resistance
Source: eLife. 2020 May 12;9:e51015. doi: 10.7554/eLife.51015 (PMC7217694; doi:10.7554/eLife.51015)
Supplement: Figure 1—source data 1. [file elife-51015-fig1-data1.xlsx]

## Sheet: Figure 1-souce data 1
Samples analyzed at the pfk13 gene level by region and month. Guyana 2016-2017
	March-2016	April-2016	May-2016	June-2016	July-2016	Aug.-2016	Sept.-2016	Oct.-2016	Nov.-2016	Dec.-2016	2016	Jan.-2017	Feb.-2017	March-2017	April-2017	May-2017	June-2017	July-2017	Aug.-2017	Sept.-2017	2017	2016-2017
REGION 1
C580Y	0	1	2	4	1	0	1	0	0	0	9	0	0	0	1	0	0	0	0	0	1	10
WT	2	13	13	12	14	9	8	5	5	7	88	10	1	0	3	1	0	0	1	0	16	104
Total	2	14	15	16	15	9	9	5	5	7	97	10	1	0	4	1	0	0	1	0	17	114
% of mutants	0.00%	7.14%	13.33%	25.00%	6.67%	0.00%	11.11%	0.00%	0.00%	0.00%	9.28%	0.00%	0.00%	ND	25.00%	0.00%	ND	ND	0.00%	ND	5.88%	8.77%
REGION 7
C580Y	0	0	1	1	0	1	0	0	0	0	3	0	0	0	0	0	0	0	0	0	0	3
WT	10	67	73	49	49	44	27	34	44	70	467	71	3	0	0	1	0	0	17	10	102	569
Total	10	67	74	50	49	45	27	34	44	70	470	71	3	0	0	1	0	0	17	10	102	572
% of mutants	0.00%	0.00%	0.0135135	0.02	0.00%	0.0222222	0.00%	0.00%	0.00%	0.00%	0.64%	0.00%	0.00%	ND	ND	0.00%	ND	ND	0.00%	0.00%	0.00%	0.52%
REGION 8
C580Y	0	0	0	0	0	1	0	0	0	0	1	0	0	0	0	0	0	0	0	0	0	1
WT	0	3	7	6	10	13	9	11	16	18	93	4	17	12	7	16	0	0	0	0	56	149
Total	0	3	7	6	10	14	9	11	16	18	94	4	17	12	7	16	0	0	0	0	56	150
% of mutants	0.00%	0.00%	0.00%	0.00%	0.00%	7.14%	0.00%	0.00%	0.00%	0.00%	1.06%	0.00%	0.00%	0.00%	0.00%	0.00%	ND	ND	ND	ND	0.00%	0.67%
OTHER REGIONS ENTIRELY WILD-TYPE
REGION 2	0	0	0	0	0	0	1	0	0	0	1	1	0	0	0	0	0	0	0	0	1	2
REGION 3	0	3	1	1	3	0	0	0	0	0	8	2	0	0	0	0	0	0	0	0	2	10
REGION 9	0	0	0	1	1	2	0	0	0	0	4	0	0	0	0	0	0	0	0	0	0	4
REGION 10	0	0	0	0	0	0	0	0	0	0	0	0	1	1	0	0	0	0	0	0	2	2
TOTAL NUMBER OF ANALYZED SAMPLES	12	87	97	74	78	70	46	50	65	95	674	88	22	13	11	18	0	0	18	10	180	854
% of mutants among all isolates	0.00%	1.15%	3.09%	6.76%	1.28%	2.86%	2.17%	0.00%	0.00%	0.00%	1.93%	0.00%	0.00%	0.00%	9.09%	0.00%	ND	ND	0.00%	0.00%	0.56%	1.64%
ND: not determined, WT: propeller region of pfk13 wild-type
