# Supplementary material for: Local emergence in Amazonia of Plasmodium falciparum k13 C580Y mutants associated with in vitro artemisinin resistance
Source: eLife. 2020 May 12;9:e51015. doi: 10.7554/eLife.51015 (PMC7217694; doi:10.7554/eLife.51015)
Supplement: Figure 3—source data 1. [file elife-51015-fig3-data1.xlsx]

## Sheet: Figure 3-souce data 1
Samples of region 1 analyzed at the pfk13 gene level by month, Guyana 2016-2017
	March-2016	April-2016	May-2016	June-2016	July-2016	August-2016	September-2016	October-2016	November-2016	December-2016	Total 2016	January-2017	February-2017	March-2017	April-2017	May-2017	June-2017	July-2017	August-2017	September-2017	Total 2017	Total 2016-2017
REGION 1
C580Y	0	1	2	4	1	0	1	0	0	0	9	0	0	0	1	0	0	0	0	0	1	10
WT	2	13	13	12	14	9	8	5	5	7	88	10	1	0	3	1	0	0	1	0	16	104
TOTAL NUMBER OF ANALYZED SAMPLES	2	14	15	16	15	9	9	5	5	7	97	10	1	0	4	1	0	0	1	0	17	114
% of mutants	0	0.0714286	0.133333	0.25	0.0666667	0	0.111111	0	0	0	0.0927835	0	0	#DIV/0!	0.25	0	#DIV/0!	#DIV/0!	0	#DIV/0!	0.0588235	0.0877193
