# Supplementary material for: Local emergence in Amazonia of Plasmodium falciparum k13 C580Y mutants associated with in vitro artemisinin resistance
Source: eLife. 2020 May 12;9:e51015. doi: 10.7554/eLife.51015 (PMC7217694; doi:10.7554/eLife.51015)
Supplement: Figure 4—source data 1. [file elife-51015-fig4-data1.xlsx]

## Sheet: Figure 4-source data 1
Survival rates obtained on isogenic lines pfk13 wild-type, C580Y or R539T
Test Name	Survival rates
IPC4912 Test 1	0.42			Mean	Standard deviation	Standard Error of the Mean
IPC4912 Test 2	0.3084		IPC4912	0.315833	0.100656	0.0581138
IPC4912 Test 3	0.2191		R086	0.00636667	0.00395517	0.00228352
R086 Test 1	0.0051		R086 Ctrl	0.00616667	0.0068252	0.00394053
R086 Test 2	0.0032		R086C580Y	0.1368	0.0255319	0.0147409
R086 Test 3	0.0108		R086R539T	0.329833	0.0863669	0.049864
R086Ctrl Test 1	0.005		O141-A	0.00493333	0.00106927	0.000617342
R086Ctrl Test 2	0		O141-ACtrl	0.0051	0.00181934	0.0010504
R086Ctrl Test 3	0.0135		O141-AC580Y	0.2757	0.120978	0.0698464
R086C580Y Test 1	0.1534
R086C580Y Test 2	0.1496
R086C580Y Test 3	0.1074		student tests
R086R539T Test 1	0.2894			t-test type	p-value	Significance
R086R539T Test 2	0.429		R086 R086Ctrl	Bilatéral	0.967566	ns
R086R539T Test 3	0.2711		R086 R086C580Y	Unilatéral	0.00554293	**< 0,01
O141-A Test 1	0.0056		R086 R086R539T	Unilatéral	0.0113776	* <0,05
O141-A Test 2	0.0037		R086Ctrl R086C580Y	Unilatéral	0.00439629	**< 0,01
O141-A Test 3	0.0055		R086Ctrl R086R539T	Unilatéral	0.011176	* <0,05
O141-Actrl Test 1	0.0072
O141-Actrl Test 2	0.004		O141-A O141-Actrl	Bilatéral	0.89927	ns
O141-Actrl Test 3	0.0041		O141-A O141-AC580Y	Unilatéral	0.0302748	* <0,05
O141-AC580Y Test 1	0.2881		O141-Actrl O141-AC580Y	Unilatéral	0.0302985	* <0,05
O141-AC580Y Test 2	0.39
O141-AC580Y Test 3	0.149
