# Supplementary material for: Local emergence in Amazonia of Plasmodium falciparum k13 C580Y mutants associated with in vitro artemisinin resistance
Source: eLife. 2020 May 12;9:e51015. doi: 10.7554/eLife.51015 (PMC7217694; doi:10.7554/eLife.51015)
Supplement: Figure 5—figure supplement 1—source data 1. [file elife-51015-fig5-figsupp1-data1.xlsx]

## Sheet: Standard curves
Data for establishment of standard curves used in the optimization of the pfk13 C580Y or R539T Taqman allelic discrimination qPCR assays. Each row represents a technical replicate.
Amount of DNA template (ng)	FAM-580C Ct values	HEX-580Y Ct values		Amount of DNA template (ng)	FAM-539R Ct Values	HEX-539T Ct Values
10	18.75	21.576		10	20.243	24.323
	18.906	21.964			20.294	24.482
	18.84	21.659			20.274	24.398
1	22.466	25.349		1	24.012	27.898
	22.556	25.911			23.994	27.866
	22.456	25.967			23.967	27.917
0.1	26.307	29.407		0.1	27.934	31.241
	26.346	29.35			27.882	31.396
	26.368	29.382			27.845	31.211
0.01	29.852	32.601		0.01	32.287	34.726
	30.03	32.618			32.286	35.002
	30.1	32.942			32.123	34.722
0.001	31.281	35.46		0.001	34.488	37.996
	31.481	35.523			34.194	38.351
	31.47	35.497			34.725	38.728

## Sheet: Plasmid mix standards
Percent of each pfk13 allele using a pre-defined set of mixtures containing plasmids expressing wild-type to mutant alleles in fixed ratios (0:100, 20:80, 40:60, 50:50, 60:40, 80:20, 100:0) determined by taqman allelic discrimination qPCR. Each row represents a technical replicate measurement.
		qPCR					qPCR
% C580 plasmid in mixture	% 580Y plasmid in mixture	% C580	% 580Y		% R539 plasmid in mixture	% 539T plasmid in mixture	% R539	% 539T
100	0	97.3	0.8		100	0	104.9	0.2
		100.1	-0.8				98.2	0
		102.6	0				96.9	-0.2
80	20	83.8	27.9		80	20	87.3	26.9
		82.9	28.1				85.4	26.1
		84.6	28.4				82.1	30.9
60	40	65.1	51.1		60	40	75.3	46.8
		69.8	53.4				69.4	49.7
		67.3	52				72.1	47.5
50	50	53.3	62.1		50	50	68.8	58.3
		55.5	60.2				64.7	56.3
40	60	42.7	70				63	56.5
		47.3	67.7		40	60	32.1	87.5
		48.2	70.3				54	65.1
20	80	24.8	83.5				53.3	63.1
		26.2	85.9		20	80	38.6	81.8
		30.6	87.9				34.2	82.6
0	100	-3.9	97.8				33.3	79.3
		-0.8	99.4		0	100	1.2	103
		4.7	102.7				-1.2	97
							0	100
