# Supplementary material for: Local emergence in Amazonia of Plasmodium falciparum k13 C580Y mutants associated with in vitro artemisinin resistance
Source: eLife. 2020 May 12;9:e51015. doi: 10.7554/eLife.51015 (PMC7217694; doi:10.7554/eLife.51015)
Supplement: Figure 5—figure supplement 2—source data 1. [file elife-51015-fig5-figsupp2-data1.xlsx]

## Sheet: qPCR replicate comparisons
Data for the reproducibility of the Taqman allelic discrimination assay across qPCR repeats and sampling replicates performed with R086WT vs R086R539T parasites.
Percentage of pfk13 R539T parasites in two separate qPCR technical replicate runs and in two sampling replicates over 60 days in culture. Shown are the qPCR repeat and sampling replicate measurements.
Day	% 539T (Sampling rep. A) qPCR repeat 1	% 539T (Sampling rep. A) qPCR repeat 2	% 539T (Sampling rep. B) qPCR repeat 1	% 539T (Sampling rep. B) qPCR repeat 2
0	61.7	61.6	61.9	61.5
2	62	62	61.7	61.6
4	66.8	66.8	66.3	66.1
6	61.2	61	62	62.1
8	56.1	56.1	56	56
10	54.2	54	55.2	57.7
12	56	56.3	56.8	56.9
14	58.4	58.5	60	60
16	55.1	55.5	56.3	55.9
18	51.1	51	53	52.9
20	48.4	48.2	49.4	49.4
22	48.6	48.9	51.4	51.2
24	48.4	48.4	50.6	50.8
26	46.5	46.6	50.7	51
28	46.8	46.7	51.2	51.2
30	45.6	45.3	48.3	48.5
32	43.6	43.8	45.3	45.1
34	42.7	42.8	43.3	43.5
36	43.8	43.9	43	43.1
38	42.8	42.5	43.4	43.2
40	41	41.1	43	43.3
42	39.7	39.5	40.8	40.7
44	38.2	37.9	38.1	38
46	36.8	36.6	36.3	36.2
48	37.9	37.4	36.5	35.7
50	37.2	37.9	35	35.1
52	36.6	36.9	33.7	33.2
56	36.6	36.6	35.2	35.3
58	37.4	36.6	34.1	34.4
60	38.8	38.5	34.9	35.3
