# Supplementary material for: Local emergence in Amazonia of Plasmodium falciparum k13 C580Y mutants associated with in vitro artemisinin resistance
Source: eLife. 2020 May 12;9:e51015. doi: 10.7554/eLife.51015 (PMC7217694; doi:10.7554/eLife.51015)
Supplement: Figure 5—source data 1. [file elife-51015-fig5-data1.xlsx]

## Sheet: Figure 5-source data 1
Proportion of pfk13 mutants compared to pfk13 wild-type during 60-days of in vitro co-culture.
	R086 pfk13 C580Y / WT					R086 pfk13 R539T / WT					O141-A pfk13 C580Y / WT
	Sampling BioReplicate 1		Sampling BioReplicate 2			Sampling BioReplicate 1		Sampling BioReplicate 2			Sampling BioReplicate 1		Sampling BioReplicate 2
Day	Technical replicate A	Technical replicate B	Technical replicate A	Technical replicate B		Technical replicate A	Technical replicate B	Technical replicate A	Technical replicate B		Technical replicate A	Technical replicate B	Technical replicate A	Technical replicate B
0	0.691746	0.687016	0.4643	0.489152		0.616912	0.618832	0.536066	0.542749		0.611111	0.630554	0.522464	0.523215
2	0.665643	0.661519	0.522572	0.532146		0.619869	0.61664	0.604317	0.623944		0.599065	0.612163	0.509431	0.511131
4	0.675298	0.679128	0.535333	0.538116		0.667635	0.662825	0.59008	0.601285		0.614077	0.617698	0.538652	0.539079
6	0.637564	0.639826	0.475176	0.473445		0.611663	0.6197	0.556883	0.561357		0.599113	0.591687	0.508957	0.476197
8	0.595474	0.600191	0.442722	0.446811		0.560501	0.560031	0.5515	0.548273		0.569329	0.57745	0.498418	0.4974
10	0.570775	0.566534	0.461786	0.430623		0.54191	0.552121	0.55274	0.556245		0.560111	0.562728	0.466765	0.455743
12	0.581682	0.580565	0.439799	0.433618		0.560385	0.567682	0.546095	0.537459		0.53307	0.527897	0.417836	0.450314
14	0.587771	0.597387	0.411858	0.43274		0.583875	0.599924	0.544729	0.54847		0.499081	0.481273	0.4026	0.422176
16	0.565034	0.560722	0.393083	0.441745		0.551425	0.563205	0.525391	0.526346		0.48872	0.493637	0.43142	0.415564
18	0.536011	0.53838	0.375324	0.37491		0.51063	0.529959	0.492526	0.493785		0.492849	0.489241	0.390381	0.371935
20	0.523799	0.538629	0.346493	0.383712		0.48372	0.494022	0.468103	0.45343		0.490866	0.488391	0.366559	0.347117
22	0.543468	0.552111	0.304414	0.335792		0.485869	0.513983	0.455113	0.43717		0.495597	0.481452	0.2951	0.32189
24	0.520687	0.525744	0.331344	0.354603		0.483641	0.506234	0.45746	0.446846		0.478935	0.46945	0.321997	0.320225
26	0.485961	0.483378	0.338407	0.355428		0.464868	0.507157	0.455127	0.446288		0.426646	0.425433	0.319874	0.321597
28	0.463095	0.497642	0.328314	0.335198		0.467932	0.51188	0.436234	0.414671		0.398443	0.393355	0.345676	0.29694
30	0.454271	0.479311	0.333169	0.282335		0.45578	0.48255	0.411918	0.403478		0.347691	0.319199	0.317355	0.226854
32	0.460464	0.474393	0.319902	0.300077		0.435584	0.45348	0.384259	0.394101		0.334831	0.334093	0.288373	0.238515
34	0.436606	0.437887	0.313131	0.285356		0.426794	0.433219	0.361535	0.381201		0.292382	0.298536	0.268407	0.265876
36	0.431542	0.425487	0.29453	0.30541		0.43776	0.429994	0.362331	0.371309		0.300688	0.268718	0.226158	0.240679
38	0.421884	0.438742	0.266345	0.306893		0.427822	0.43375	0.361914	0.356655		0.27024	0.244173	0.19789	0.240885
40	0.410269	0.425074	0.28254	0.305403		0.410075	0.429787	0.351416	0.329226		0.291038	0.269715	0.219766	0.248147
42	0.384971	0.400773	0.300502	0.288582		0.397143	0.407504	0.345874	0.312697		0.268636	0.239116	0.223495	0.214531
44	0.394176	0.397447	0.306033	0.277523		0.381633	0.380527	0.340764	0.306022		0.275883	0.242114	0.219912	0.187001
46	0.398677	0.365475	0.298783	0.249185		0.36797	0.363292	0.33344	0.309493		0.236916	0.237421	0.242518	0.170714
48	0.394669	0.369612	0.311888	0.260512		0.379499	0.364518	0.331785	0.316126		0.196465	0.231197	0.207474	0.170985
50	0.396374	0.371066	0.30615	0.286054		0.371826	0.350389	0.34867	0.321088		0.174515	0.225161	0.201005	0.171272
52	0.376464	0.37249	0.297872	0.282277		0.366295	0.337095	0.364062	0.341013		0.196256	0.205244	0.15476	0.182477
54	0.376729	N/A	0.289832	0.297694		N/A	N/A	0.386041	0.340382		N/A	N/A	0.132707	0.183782
56	0.373915	0.372333	0.31916	0.311305		0.366484	0.352392	0.420337	0.375091		0.179701	0.164797	0.134866	0.163185
58	0.349224	0.369084	0.301904	0.31032		0.374214	0.341233	0.451073	0.420243		0.175557	0.166881	0.136096	0.150406
60	0.368567	0.366158	0.328521	0.297175		0.387875	0.349214	0.477731	0.436068		0.204182	0.185272	0.162574	0.147107
