# Supplementary material for: Local emergence in Amazonia of Plasmodium falciparum k13 C580Y mutants associated with in vitro artemisinin resistance
Source: eLife. 2020 May 12;9:e51015. doi: 10.7554/eLife.51015 (PMC7217694; doi:10.7554/eLife.51015)
Supplement: Supplementary file 2. [file elife-51015-supp2.xlsx]

## Sheet: Guyana_swga_associated_markers_
								Number of genotype calls				Genotype frequency
Gene ID	Gene Description	Chromosome	Position	3D7 nt	Alternate nt	Effect	Amino acid change	Guyana wildtype samples	Guyana C580Y mutant samples	Total Guyana sample calls	Edited French Guiana lines	Guyana wildtype samples	Nb Guyana wildtype samples	Guyana C580Y mutant samples	Nb Guyana C580Y mutant samples	Edited French Guiana lines
PF3D7_0520800	conserved Plasmodium protein, unknown function	5	852380	T	C	Nonsynonymous	Lys1216Arg	26	8	34	2	0.192308	5	1	8	0
			852597	T	C	Nonsynonymous	Asn1144Asp	22	9	31	2	0.727273	16	0	0	1
			853798	A	T	Nonsynonymous	Asp743Glu	19	7	26	2	0.736842	14	0	0	1
			854988	G	A	Nonsynonymous	Pro347Ser	24	9	33	2	0.0416667	1	0	0	0
			855823	T	C	Synonymous	Val68Val	22	7	29	2	0.954545	21	1	7	1
PF3D7_0602800	JmjC domain containing protein (JmjC2)	6	116094	C	T	Nonsynonymous	Ser4Phe	26	8	34	2	0.115385	3	0	0	0
			116243	C	T	Synonymous	Leu54Leu	26	8	34	2	0.615385	16	0	0	0.5
			116251	T	C	Synonymous	Asn56Asn	25	8	33	2	0.6	15	0	0	0.5
			116607	A	G	Nonsynonymous	Asn175Ser	25	9	34	2	0.04	1	0	0	0
			116620	A	C	Nonsynonymous	Lys179Asn	25	9	34	2	0.2	5	0	0	0
			116621	T	G	Nonsynonymous	Tyr180Asp	25	9	34	2	0.2	5	0	0	0
			116629	G	A	Synonymous	Glu182Glu	24	9	33	2	0.208333	5	0	0	0
			116866	T	C	Synonymous	Phe261Phe	24	8	32	2	0.125	3	0	0	0
			116875	A	G	Synonymous	Gln264Gln	23	8	31	2	0.130435	3	0	0	0
			116977	T	C	Synonymous	Asn298Asn	24	8	32	2	0.833333	20	1	8	1
PF3D7_0709000	chloroquine resistance transporter (CRT)	7	405444	G	A	Intron	-	26	8	34	2	0.0384615	1	0	0	0
			405581	T	C	Nonsynonymous	Cys350Arg	25	8	33	2	0.56	14	0	0	0.5
			405912	A	T	Intron	-	27	9	36	2	0	0	0.111111	1	0
PF3D7_0720700	phosphoinositide‐binding protein, putative	7	894129	T	C	Synonymous	Asp640Asp	23	8	31	2	0.0869565	2	1	8	1
			894384	C	G	Synonymous	Leu725Leu	24	8	32	2	0.708333	17	1	8	1
			895206	T	C	Synonymous	Asn999Asn	21	5	26	2	0.952381	20	1	5	1
			895938	C	G	Nonsynonymous	Asn1243Lys	25	8	33	2	0.4	10	0	0	0
			896036	T	G	Nonsynonymous	Met1276Arg	24	8	32	2	0.0833333	2	0	0	0
			896073	A	G	Synonymous	Val1288Val	18	7	25	2	0.444444	8	1	7	1
			896086	A	G	Nonsynonymous	Asn1293Asp	13	7	20	2	0.615385	8	1	7	1
			897204	C	A	Synonymous	Val1665Val	24	8	32	2	0.25	6	0	0	0
			897208	G	A	Nonsynonymous	Gly1667Ser	24	8	32	2	0.25	6	0	0	0
			897312	G	A	Nonsynonymous	Met1701Ile	21	8	29	2	0.619048	13	0	0	0
			897330	A	G	Nonsynonymous	Ile1707Met	23	8	31	2	0.0869565	2	0	0	0
			897340	G	A	Nonsynonymous	Asp1711Asn	22	8	30	2	0.5	11	0	0	0
			897484	A	G	Nonsynonymous	Lys1759Glu	25	8	33	2	0.24	6	0	0	0
			897916	A	G	Nonsynonymous	Thr1903Ala	24	9	33	2	0.5	12	0	0	0
PF3D7_0807600	conserved Plasmodium protein, unknown function	8	391991	A	T	Nonsynonymous	Phe582Ile	22	9	31	2	0.0909091	2	0	0	0.5
			392092	T	A	Nonsynonymous	Lys548Ile	20	9	29	2	0.35	7	0	0	0
PF3D7_0809600	peptidase family C50, putative	8	480491	G	A	Nonsynonymous	Ser5631Phe	20	9	29	2	0.05	1	0	0	0
			488353	T	C	Synonymous	Lys3010Lys	26	11	37	2	0.192308	5	0	0	0
			494713	A	G	Synonymous	Asn890Asn	23	9	32	2	0.956522	22	1	9	1
			495289	A	G	Synonymous	Ser698Ser	25	10	35	2	0.04	1	0	0	0
			496611	C	A	Nonsynonymous	Asp258Tyr	26	10	36	2	0.0384615	1	0	0	0
PF3D7_0817300	asparagine‐rich antigen	8	786437	A	G	Synonymous	Tyr1060Tyr	28	7	35	2	0.214286	6	0	0	0
			787459	G	A	Nonsynonymous	His720Tyr	29	7	36	2	0	0	0.142857	1	0
			787460	T	A	Nonsynonymous	Glu719Asp	29	7	36	2	0	0	0.142857	1	0
			787462	C	A	Nonsense	Glu719*	29	7	36	2	0	0	0.142857	1	0
			787463	T	A	Nonsynonymous	Glu718Asp	29	7	36	2	0	0	0.142857	1	0
			787465	C	A	Nonsense	Glu718*	29	7	36	2	0	0	0.142857	1	0
PF3D7_0924000	patatin‐like phospholipase, putative	9	973798	A	G	Synonymous	Lys417Lys	21	8	29	2	0.238095	5	0	0	0
			974270	A	T	Nonsynonymous	Ile575Phe	20	9	29	2	0.3	6	0	0	0
			974368	A	G	Synonymous	Leu607Leu	20	9	29	2	0.25	5	0	0	0
			975997	T	A	Synonymous	Ile1150Ile	26	7	33	2	0.0769231	2	0	0	0
PF3D7_0926100	protein kinase, putative	9	1048641	T	A	Nonsynonymous	Glu3059Val	23	8	31	2	0.0434783	1	0	0	0
			1052473	T	C	Nonsynonymous	Met1782Val	5	8	13	0	0.2	1	0	0	NA
			1052516	T	C	Nonsynonymous	Ile1767Met	6	8	14	1	0.333333	2	0	0	0
			1054405	T	C	Nonsynonymous	Asn1138Asp	3	1	4	0	0.666667	2	1	1	NA
			1054407	T	C	Nonsynonymous	Asp1137Gly	3	1	4	0	0.666667	2	1	1	NA
			1054435	T	C	Nonsynonymous	Asn1128Asp	13	6	19	1	0.0769231	1	0	0	0
			1054710	T	C	Nonsynonymous	Lys1036Arg	21	8	29	2	0.0952381	2	0	0	0
PF3D7_1012700	protein phosphatase, putative	10	488414	C	T	Nonsynonymous	Ser388Leu	28	7	35	2	0	0	0.142857	1	0
			491294	T	A	Intron	-	18	7	25	2	0.0555556	1	0	0	0
			491319	C	G	Intron	-	16	7	23	2	0.75	12	0	0	1
PF3D7_1202300	dynein heavy chain, putative	12	122555	T	C	Synonymous	Asn975Asn	23	8	31	2	0.217391	5	0	0	0
			123645	T	C	Synonymous	Leu1339Leu	23	9	32	2	0.347826	8	0	0	0.5
			128290	A	T	Intron	-	20	3	23	2	0.8	16	0.666667	2	1
			128292	A	T	Intron	-	20	3	23	2	0.8	16	1	3	1
			128294	A	T	Intron	-	19	3	22	2	0.842105	16	1	3	1
			128975	A	T	Nonsynonymous	Asp2409Val	26	8	34	2	0.153846	4	0	0	0
			129849	G	A	Nonsynonymous	Ser2641Asn	30	11	41	2	0.1	3	0	0	0
			129852	G	A	Nonsynonymous	Ser2642Asn	29	9	38	2	0.103448	3	0	0	0
			130358	C	T	Nonsynonymous	His2811Tyr	31	9	40	2	0.0322581	1	0	0	0
			132415	C	A	Intron	-	29	9	38	2	0.586207	17	0.888889	8	1
			137163	T	G	Intron	-	27	8	35	2	0.148148	4	0	0	0
PF3D7_1205300	conserved Plasmodium protein, unknown function	12	231333	G	A	Nonsynonymous	Glu291Lys	27	8	35	2	0.037037	1	0	0	0
PF3D7_1218800	conserved Plasmodium protein, unknown function (PSOP17)	12	740249	A	T	Nonsynonymous	Leu3Ile	25	7	32	2	0.08	2	0	0	0
PF3D7_1227500	cyclin (CYC2)	12	1115717	T	A	Nonsynonymous	Asn1793Tyr	26	9	35	2	0.0384615	1	0	0	0
			1118681	C	T	Nonsynonymous	Glu805Lys	24	9	33	2	0.208333	5	0	0	0
			1119582	T	A	Nonsynonymous	Arg504Ser	27	8	35	2	0.888889	24	1	8	1
			1119627	G	A	Synonymous	Ile489Ile	27	8	35	2	0.185185	5	0	0	0
PF3D7_1234100	conserved Plasmodium protein, unknown function	12	1414810	G	T	Nonsynonymous	Asp133Tyr	28	9	37	2	0.428571	12	0.444444	4	0.5
			1414823	A	G	Nonsynonymous	His137Arg	28	9	37	2	0.428571	12	0.444444	4	0.5
			1414828	T	G	Nonsynonymous	Tyr139Asp	27	9	36	2	0.444444	12	0.444444	4	0.5
			1414841	G	A	Nonsynonymous	Arg143His	26	9	35	2	0.423077	11	0.444444	4	0.5
			1415865	C	T	Synonymous	His484His	28	8	36	2	0.0357143	1	0	0	0
			1415954	T	A	Nonsynonymous	Phe514Tyr	28	10	38	2	0.0357143	1	0	0	0
			1415963	A	G	Nonsynonymous	Glu517Gly	28	9	37	2	0.857143	24	1	9	1
			1416560	A	T	Nonsynonymous	Lys716Met	28	10	38	2	0.0357143	1	0	0	0
			1419810	A	G	Synonymous	Thr1799Thr	24	8	32	2	0.125	3	0	0	0
			1421931	C	T	Synonymous	Asn2506Asn	26	7	33	2	0.961538	25	1	7	1
			1422482	G	A	Nonsynonymous	Gly2690Asp	22	6	28	2	0.181818	4	1	6	0
PF3D7_1238300	cell cycle control protein, putative	12	1590890	T	C	Synonymous	Val574Val	16	7	23	2	0.3125	5	0	0	0
PF3D7_1239800	conserved Plasmodium protein, unknown function	12	1660616	T	C	Synonymous	Leu56Leu	28	9	37	2	0.857143	24	1	9	0.5
			1660673	A	G	Nonsynonymous	Lys75Glu	28	8	36	2	0.928571	26	1	8	1
			1661528	G	A	Nonsynonymous	Glu360Lys	21	7	28	2	0.047619	1	0	0	0
			1661755	G	C	Synonymous	Leu435Leu	21	7	28	2	0.142857	3	0	0	0.5
			1661867	A	T	Nonsynonymous	Ile473Leu	20	6	26	2	0.95	19	1	6	0.5
			1663492	A	G	Synonymous	Glu1014Glu	19	6	25	2	0.0526316	1	0	0	0
			1666837	T	C	Synonymous	Asn2129Asn	13	6	19	2	0	0	0	0	0.5
			1666882	C	T	Synonymous	Asn2144Asn	11	7	18	2	0	0	0	0	0.5
			1666891	T	C	Synonymous	Asn2147Asn	11	7	18	2	0	0	0	0	0.5
			1667472	A	G	Nonsynonymous	Asn2341Ser	9	3	12	2	0.777778	7	0.666667	2	0
			1667498	A	G	Nonsynonymous	Asn2350Asp	11	3	14	2	0.727273	8	1	3	0
			1667593	T	C	Synonymous	Asn2381Asn	6	4	10	2	0.833333	5	1	4	0
			1670179	G	C	Nonsynonymous	Lys3243Asn	13	7	20	2	0	0	0	0	0.5
			1670594	A	G	Nonsynonymous	Asn3382Asp	10	6	16	2	0.1	1	0	0	0.5
			1670700	T	A	Nonsynonymous	Phe3417Tyr	9	6	15	2	0	0	0	0	0.5
			1670718	T	C	Nonsynonymous	Phe3423Ser	7	6	13	2	0.857143	6	1	6	0.5
			1670910	A	G	Nonsynonymous	Asn3487Ser	9	6	15	2	0.666667	6	0	0	0
			1671361	T	A	Nonsynonymous	Asn3637Lys	5	7	12	2	0.8	4	0	0	0.5
			1671599	A	G	Nonsynonymous	Thr3717Ala	12	5	17	2	0.0833333	1	1	5	0.5
			1673485	G	A	Synonymous	Leu4345Leu	10	5	15	2	0.1	1	0	0	0
			1673815	A	G	Synonymous	Lys4455Lys	11	6	17	2	0.0909091	1	0	0	0.5
			1674154	C	T	Synonymous	Asp4568Asp	13	6	19	2	0.0769231	1	0	0	0.5
			1674178	G	A	Synonymous	Leu4576Leu	13	7	20	2	0.0769231	1	0	0	0.5
			1674208	T	A	Synonymous	Thr4586Thr	14	8	22	2	0.142857	2	0	0	0.5
			1674565	C	G	Nonsynonymous	Asn4705Lys	13	8	21	2	0	0	0	0	0.5
			1676157	C	T	Nonsynonymous	Thr5236Ile	20	8	28	2	0.1	2	0	0	0
			1677142	A	G	Synonymous	Leu5564Leu	16	8	24	2	0.6875	11	1	8	0.5
			1677214	G	A	Synonymous	Lys5588Lys	17	8	25	2	0.705882	12	1	8	0.5
PF3D7_1241300	conserved Plasmodium protein, unknown function	12	1758481	T	C	Nonsynonymous	Glu240Gly	31	9	40	2	0.0645161	2	0	0	0
			1759060	A	C	Nonsynonymous	Val47Gly	31	8	39	2	0.0322581	1	0	0	0
PF3D7_1241900	Tetratricopeptide repeat protein, putative	12	1785004	G	A	Nonsynonymous	Glu209Lys	21	9	30	2	0.047619	1	0	0	0
PF3D7_1252100	rhoptry neck protein 3+(RON3)	12	2115229	G	C	Nonsynonymous	Thr2016Arg	12	6	18	2	0.833333	10	0	0	1
			2115873	A	G	Synonymous	His1801His	9	6	15	2	1	9	0	0	1
			2116182	G	C	Synonymous	Thr1698Thr	10	6	16	2	0.9	9	0	0	1
			2116295	C	G	Nonsynonymous	Val1661Leu	10	5	15	2	0	0	1	5	0
			2116730	G	C	Nonsynonymous	Gln1516Glu	5	4	9	2	0.8	4	1	4	1
			2118264	G	T	Nonsynonymous	Asn1004Lys	10	5	15	2	0.2	2	0	0	0
PF3D7_1318300	conserved Plasmodium protein, unknown function	13	757089	G	A	Synonymous	Lys1060Lys	24	8	32	2	0.0416667	1	0	0	0
PF3D7_1322700	conserved Plasmodium protein, unknown function	13	958675	T	C	Synonymous	Lys167Lys	28	8	36	2	0.0357143	1	0	0	0
PF3D7_1343100	conserved Plasmodium protein, unknown function	13	1700345	T	C	Nonsynonymous	Asn96Asp	29	7	36	2	0.827586	24	1	7	1
PF3D7_1343400	DNA helicase, putative	13	1715393	C	T	Synonymous	Gly204Gly	22	6	28	2	0.363636	8	0	0	0
			1716082	T	A	Intron	-	16	7	23	2	0.125	2	0	0	0
			1716321	G	A	Synonymous	Val475Val	18	6	24	2	0.277778	5	0	0	0
PF3D7_1343700	kelch protein K13	13	1725259	C	T	Nonsynonymous	Cys580Tyr	21	9	30	2	0	0	1	9	0
			1726432	T	G	Nonsynonymous	Lys189Thr	21	9	30	2	0.428571	9	1	9	0
PF3D7_1343800	conserved Plasmodium protein, unknown function	13	1730887	C	T	Nonsynonymous	Glu7534Lys	28	10	38	2	0.25	7	0	0	0
			1732117	A	G	Nonsynonymous	Phe7124Leu	26	9	35	2	0.346154	9	0	0	1
			1732910	T	C	Synonymous	Arg6859Arg	27	9	36	2	0.148148	4	1	9	0
			1734173	A	T	Synonymous	Ile6438Ile	20	9	29	2	0.15	3	0	0	0
			1736456	T	C	Synonymous	Gln5677Gln	21	7	28	2	0.142857	3	1	7	0
			1737057	G	C	Nonsynonymous	Thr5477Arg	14	7	21	2	0.285714	4	0	0	1
			1737110	G	A	Synonymous	Gly5459Gly	12	6	18	2	0.416667	5	0	0	1
			1738283	C	G	Nonsynonymous	Met5068Ile	16	8	24	2	0.375	6	0	0	1
			1738305	G	T	Nonsynonymous	Thr5061Asn	18	8	26	2	0.222222	4	0	0	0
			1745511	C	T	Nonsynonymous	Arg2659Gln	15	6	21	2	0.733333	11	1	6	1
			1745609	T	C	Synonymous	Lys2626Lys	14	6	20	2	0.785714	11	1	6	1
			1745650	G	A	Nonsynonymous	His2613Tyr	15	8	23	2	0.133333	2	0	0	0
			1746548	T	A	Nonsynonymous	Lys2313Asn	23	9	32	2	0.0434783	1	0	0	0
			1747088	C	T	Synonymous	Thr2133Thr	18	8	26	2	0.0555556	1	0	0	0
			1747786	G	A	Nonsynonymous	His1901Tyr	12	4	16	2	0.583333	7	1	4	1
			1749551	G	A	Synonymous	Phe1312Phe	23	9	32	2	0.0434783	1	0	0	0
			1751018	G	T	Synonymous	Ile823Ile	21	7	28	2	0.047619	1	0	0	0
			1751486	T	A	Nonsynonymous	Glu667Asp	24	8	32	2	0.0416667	1	0	0	0
PF3D7_1345400	conserved Plasmodium protein, unknown function	13	1819349	C	G	Nonsynonymous	Ser651Thr	18	8	26	2	0.277778	5	1	8	0.5
			1820162	G	A	Nonsynonymous	Thr380Ile	16	7	23	2	0.3125	5	1	7	0.5
PF3D7_1346400	conserved Plasmodium protein, unknown function	13	1853984	A	G	Nonsynonymous	Asn363Asp	8	1	9	2	0.875	7	1	1	1
			1853989	C	T	Synonymous	Asn364Asn	8	1	9	2	0.875	7	1	1	1
			1855086	G	T	Nonsynonymous	Ser730Ile	18	5	23	2	0.0555556	1	0	0	0
			1856271	A	G	Nonsynonymous	Asp1125Gly	12	5	17	2	0.583333	7	1	5	0.5
			1856700	C	T	Nonsynonymous	Thr1268Ile	17	5	22	2	0.294118	5	0	0	0.5
			1857495	G	T	Nonsynonymous	Arg1533Ile	15	5	20	2	0.2	3	0	0	0.5
			1857598	A	G	Synonymous	Glu1567Glu	16	3	19	2	0.625	10	1	3	0.5
			1858907	C	T	Nonsynonymous	Pro2004Ser	18	5	23	2	0.111111	2	0	0	0
			1859608	G	A	Synonymous	Glu2237Glu	22	5	27	2	0.0909091	2	0	0	0.5
			1860106	C	T	Synonymous	Asn2403Asn	17	5	22	2	0.647059	11	1	5	0.5
			1860142	A	G	Synonymous	Val2415Val	23	8	31	2	0.130435	3	0	0	0
			1860400	A	G	Synonymous	Thr2501Thr	24	6	30	2	0.708333	17	1	6	0.5
			1861105	T	A	Synonymous	Ile2736Ile	22	6	28	2	0.681818	15	1	6	0.5
			1862550	G	A	Nonsynonymous	Arg3218Lys	22	5	27	2	0.0909091	2	0	0	0
			1862558	C	A	Nonsynonymous	His3221Asn	22	5	27	2	0.136364	3	0	0	0.5
			1864623	C	A	Nonsynonymous	Thr3909Asn	11	2	13	2	0.636364	7	1	2	0.5
			1865960	A	C	Nonsynonymous	Ile4355Leu	11	3	14	2	0.0909091	1	0	0	0
			1866018	A	G	Nonsynonymous	Asn4374Ser	8	2	10	2	0.5	4	1	2	0.5
			1866319	G	A	Synonymous	Leu4474Leu	14	4	18	2	0.142857	2	0	0	0
			1867010	T	A	Nonsynonymous	Cys4705Ser	11	4	15	2	0.0909091	1	0	0	0
			1867601	T	A	Nonsynonymous	Leu4902Ile	11	4	15	2	0.0909091	1	0	0	0.5
			1867630	G	C	Nonsynonymous	Met4911Ile	11	4	15	2	0.0909091	1	0	0	0.5
			1869685	C	T	Synonymous	Ile5596Ile	16	6	22	2	0.0625	1	0	0	0
PF3D7_1347900	conserved Plasmodium protein, unknown function	13	1918837	G	A	Nonsynonymous	Pro23Leu	33	8	41	2	0.030303	1	0	0	0
PF3D7_1349500	conserved Plasmodium protein, unknown function	13	1986165	A	G	Synonymous	Asn3150Asn	19	7	26	2	0.210526	4	0	0	0
			1986975	G	A	Synonymous	Pro2880Pro	18	6	24	2	0.111111	2	0	0	0
			1988095	A	T	Nonsynonymous	Leu2507His	19	7	26	2	0.105263	2	0	0	0
			1988097	A	G	Synonymous	Asn2506Asn	19	7	26	2	0.105263	2	0	0	0
			1988104	A	T	Nonsynonymous	Val2504Asp	19	7	26	2	0.105263	2	0	0	0
			1988919	C	T	Synonymous	Lys2232Lys	16	7	23	2	0.8125	13	1	7	1
			1989601	C	G	Nonsynonymous	Gly2005Ala	23	7	30	2	0.0869565	2	0	0	0.5
			1989765	A	G	Synonymous	Pro1950Pro	23	8	31	2	0.0434783	1	0	0	0
			1990202	A	G	Nonsynonymous	Tyr1805His	24	8	32	2	0.0416667	1	0	0	0
			1990586	T	A	Nonsynonymous	Asn1677Tyr	20	6	26	2	0.2	4	0	0	0.5
PF3D7_1350500	conserved Plasmodium protein, unknown function	13	2017344	G	T	Nonsynonymous	Asn486Lys	25	9	34	2	0.04	1	0	0	0
PF3D7_1364600	aldo‐keto reductase, putative	13	2600361	A	T	Synonymous	Ile535Ile	20	7	27	2	0.55	11	1	7	0.5
PF3D7_1436300	translocon component PTEX150 (PTEX150)	14	1479886	T	A	Nonsynonymous	Met37Lys	24	7	31	2	0.791667	19	1	7	1
			1480458	A	T	Nonsynonymous	Ile228Phe	20	6	26	2	0.3	6	0	0	0.5
			1480704	A	G	Nonsynonymous	Ser310Gly	20	6	26	2	0.25	5	0	0	0.5
			1480705	G	A	Nonsynonymous	Ser310Asn	19	6	25	2	0.263158	5	0	0	0.5
PF3D7_1441300	serine/threonine protein kinase, putative	14	1683268	C	T	Synonymous	Cys285Cys	19	7	26	2	0.842105	16	1	7	0
			1687516	T	G	Synonymous	Thr1701Thr	24	7	31	2	0.208333	5	0	0	1
PF3D7_1447900	multidrug resistance protein 2+(heavy metal transport family) (MDR2)	14	1957053	C	T	Nonsynonymous	Ser208Asn	23	8	31	2	0.956522	22	1	8	1
PF3D7_1448000	U3 snoRNA‐associated small subunit rRNA processing protein, putative	14	1960571	T	G	Nonsynonymous	Asp1097Ala	20	7	27	2	1	20	1	7	0.5
PF3D7_1450700	conserved Plasmodium protein, unknown function	14	2078755	T	A	Nonsynonymous	Leu90Ile	28	7	35	2	0.142857	4	0	0	0
PF3D7_1450800	conserved Plasmodium protein, unknown function	14	2081365	T	A	Nonsynonymous	Asn295Tyr	18	5	23	2	0.5	9	1	5	1
			2081592	A	C	Nonsynonymous	Leu219Arg	19	7	26	2	0.210526	4	0	0	0
			2081778	A	G	Nonsynonymous	Ile157Thr	19	6	25	2	0.210526	4	0	0	0
PF3D7_1451000	conserved Plasmodium protein, unknown function	14	2085628	T	A	Nonsynonymous	His631Leu	21	8	29	2	0.285714	6	0	0	0
			2086462	A	C	Nonsynonymous	Met353Arg	21	8	29	2	0.190476	4	0	0	0
PF3D7_1451200	conserved Plasmodium protein, unknown function	14	2094883	G	C	Nonsynonymous	Asn1324Lys	13	4	17	2	0.153846	2	0	0	0
			2096147	T	C	Nonsynonymous	His903Arg	16	6	22	2	0.1875	3	0	0	0
			2096327	A	G	Nonsynonymous	Leu843Ser	16	5	21	2	0.9375	15	1	5	1
PF3D7_1453900	conserved Plasmodium protein, unknown function	14	2215711	G	A	Nonsynonymous	Gly268Ser	24	6	30	2	0.0416667	1	0	0	0
			2217268	A	G	Nonsynonymous	Met787Val	24	7	31	2	0.541667	13	0	0	0
PF3D7_1457400	conserved Plasmodium protein, unknown function	14	2351152	A	G	Nonsynonymous	Ile56Met	27	9	36	2	0.111111	3	0	0	0
			2351802	C	G	Nonsynonymous	Thr273Ser	28	9	37	2	0.107143	3	0	0	0
			2351869	C	T	Synonymous	His295His	27	9	36	2	0.259259	7	0	0	0.5
			2352980	G	A	Nonsynonymous	Asp666Asn	25	10	35	2	0.2	5	0	0	0.5
			2353293	C	A	Nonsynonymous	Thr770Lys	27	9	36	2	0.333333	9	1	9	0.5
			2354379	A	G	Nonsynonymous	Lys1132Arg	28	8	36	2	0.357143	10	1	8	0.5
			2355496	G	T	Nonsynonymous	Lys1504Asn	24	9	33	2	0.291667	7	0	0	0
			2355751	T	A	Nonsynonymous	His1589Gln	23	8	31	2	0.565217	13	0	0	0.5
			2355803	G	C	Nonsynonymous	Asp1607His	22	8	30	2	0.363636	8	1	8	0.5
			2356081	G	A	Synonymous	Val1699Val	19	9	28	2	0.263158	5	0	0	0.5
			2356377	T	C	Nonsynonymous	Val1798Ala	22	8	30	2	0.227273	5	0	0	0.5
			2356431	A	T	Nonsynonymous	Glu1816Val	21	8	29	2	0.333333	7	0	0	0
			2356571	A	T	Nonsense	Lys1863*	25	8	33	2	0.04	1	0	0	0
			2356794	A	T	Nonsynonymous	Lys1937Ile	24	8	32	2	0.375	9	1	8	0.5
			2356991	A	T	Nonsynonymous	Ile2003Phe	27	8	35	2	0.037037	1	0	0	0
			2357681	T	G	Nonsynonymous	Leu2233Val	21	8	29	2	0.380952	8	1	8	0.5
			2357796	G	C	Nonsynonymous	Ser2271Thr	27	9	36	2	0	0	0.111111	1	0
			2358937	C	T	Synonymous	Asn2651Asn	28	9	37	2	0.25	7	0	0	0
			2359801	C	T	Synonymous	Asn2939Asn	28	9	37	2	0.178571	5	0	0	0.5
PF3D7_1460500	conserved Plasmodium protein, unknown function	14	2466418	A	G	Nonsynonymous	Ile110Val	23	9	32	2	0.521739	12	0	0	0
			2466455	G	T	Nonsynonymous	Ser122Ile	23	9	32	2	0.521739	12	0	0	0
			2467008	A	G	Synonymous	Ser306Ser	23	10	33	2	0.0434783	1	0	0	0
			2467918	G	A	Nonsynonymous	Asp610Asn	22	9	31	2	0.0454545	1	0	0	0.5
			2467948	A	G	Nonsynonymous	Arg620Gly	22	9	31	2	0.0454545	1	0	0	0.5
			2468266	T	A	Nonsynonymous	Tyr726Asn	21	9	30	2	0.952381	20	1	9	0.5
			2470644	T	C	Synonymous	Thr1518Thr	24	9	33	2	0.625	15	0	0	0.5
PF3D7_1461100	conserved Plasmodium protein, unknown function	14	2487293	C	T	Nonsynonymous	Thr384Ile	28	11	39	2	0.0357143	1	0	0	0
			2487541	G	T	Nonsynonymous	Asp467Tyr	27	11	38	2	0.037037	1	0	0	0
			2487856	A	G	Nonsynonymous	Asn572Asp	25	9	34	2	0.92	23	1	9	1
PF3D7_1461800	conserved Plasmodium protein, unknown function	14	2504933	A	G	Nonsynonymous	Glu262Gly	23	7	30	2	0.304348	7	0	0	0
			2508330	T	A	Nonsynonymous	Asp1394Glu	21	9	30	2	0.333333	7	0	0	0
			2508331	A	C	Nonsynonymous	Asn1395His	21	9	30	2	0.333333	7	0	0	0
			2508752	A	T	Nonsynonymous	Asn1535Ile	21	9	30	2	0.333333	7	0	0	0
			2509243	G	T	Nonsynonymous	Val1699Phe	20	8	28	2	0.55	11	1	8	0.5
			2510092	G	T	Nonsense	Glu1982*	25	9	34	2	0	0	0.111111	1	0
			2510836	A	C	Nonsynonymous	Asn2230His	25	8	33	2	0.12	3	0	0	0
			2511006	G	T	Nonsynonymous	Met2286Ile	25	8	33	2	0.04	1	0	0	0
			2512491	G	A	Nonsynonymous	Glu2736Lys	27	9	36	2	0.037037	1	0	0	0
PF3D7_1462300	conserved Plasmodium protein, unknown function	14	2524980	C	T	Nonsynonymous	Asp1339Asn	25	9	34	2	0.36	9	0	0	0
			2525230	C	G	Nonsynonymous	Lys1255Asn	23	9	32	2	0.0434783	1	0	0	0
			2525614	T	A	Synonymous	Ser1127Ser	17	9	26	2	0.235294	4	0	0	0.5
